# Supplementary material for: Genetic Variations in miR‐30 Family Member Regulatory Regions Are Associated with Breast Cancer Risk in a Chinese Population
Source: Hindawi journal article supplement (doi:10.1155/2020/8781348), 2020-01-01

**Supplementary Table 1. Demographic and selected variables in breast cancer and control patients**

| Variables                                  | Cases <sup>a</sup><br>(N=1064) | Controls <sup>b</sup><br>(N=1073) | P <sup>c</sup> |
|--------------------------------------------|--------------------------------|-----------------------------------|----------------|
| Age, year (mean ± SD)                      | 50.89±11.44                    | 51.51±11.82                       | 0.217          |
| Age at menarche, year (mean ± SD)          | 15.23±1.93                     | 16.11±1.94                        | <0.0001        |
| Age at first live birth, year (mean ± SD)  | 25.57±3.25                     | 24.62±3.35                        | <0.0001        |
| Age at natural menopause, year (mean ± SD) | 49.72±3.53                     | 49.59±3.98                        | 0.606          |
| Menopausal status                          |                                |                                   | <0.0001        |
| Premenopausal                              | 523(49.71)                     | 525(49.86)                        |                |
| Natural menopause                          | 451(42.87)                     | 505(47.96)                        |                |
| Unnatural menopause                        | 78(7.41)                       | 23(2.18)                          |                |
| Estrogen receptor (ER) <sup>d</sup>        |                                |                                   |                |
| Positive                                   | 490(56.39)                     |                                   |                |
| Negative                                   | 379(43.61)                     |                                   |                |
| Progesterone receptor (PR) <sup>d</sup>    |                                |                                   |                |
| Positive                                   | 506(58.23)                     |                                   |                |
| Negative                                   | 363(41.77)                     |                                   |                |

<sup>a</sup> Cases were consecutively recruited from the First Affiliated Hospital of Nanjing Medical University, the Cancer Hospital of Jiangsu Province and the Gulou Hospital, Nanjing, China, from Jan 2004 to April 2010;

<sup>b</sup> Controls were randomly selected from a cohort of more than 30,000 participants in a community-based screening program for non-infectious diseases conducted in Jiangsu Province;

<sup>c</sup> T-tests and  $\chi^2$  tests were used for continuous or categorical variables, respectively;

<sup>d</sup> ER and PR status information was available in 869 breast cancer cases.

**Supplementary Table 2. Summary of the functional analyses for the linkage disequilibrium (LD) block containing rs763354 ( $r^2=1$ )**

| chr | pos (hg38) | LD (r <sup>2</sup> ) | variant   | Ref | Alt | ASN freq | Promoter histone marks | Enhancer histone marks | DNase | Motifs changed    | GRASP QTL hits | Selected eQTL hits |
|-----|------------|----------------------|-----------|-----|-----|----------|------------------------|------------------------|-------|-------------------|----------------|--------------------|
| 6   | 71405918   | 1                    | rs763354  | C   | T   | 0.39     |                        | 12 tissues             |       | AIRE,Sox          | 1 hit          | 1 hit              |
| 6   | 71409013   | 1                    | rs7349905 | G   | C   | 0.39     |                        | 14 tissues             | SKIN  | AP-1,Mxi1,SREBP   |                |                    |
| 6   | 71411759   | 1                    | rs9342836 | T   | C   | 0.39     | KID, GI, LNG           | 11 tissues             |       | 11 altered motifs |                | 1 hit              |
| 6   | 71414369   | 1                    | rs1918478 | G   | T   | 0.39     | LIV, KID, LNG          | 9 tissues              |       | GATA,LUN-1        |                |                    |

LD,  $r^2$  between the variant and required one; Ref, reference allele; Alt, alternative allele; ASN, populations from Asia in 1000 genomes project; Promoter histone marks, Cell types where SNPs are in histone-marks of promoter; Enhancer histone marks, cell types where SNPs are in histone-marks of enhancer; DNase, cell types where SNPs are in the accessible region of DNase.

Supplementary Figure 1: The expression of miR-30a between 86 paired tumor and non-tumor tissues in the TCGA breast cancer (BRCA) datasets

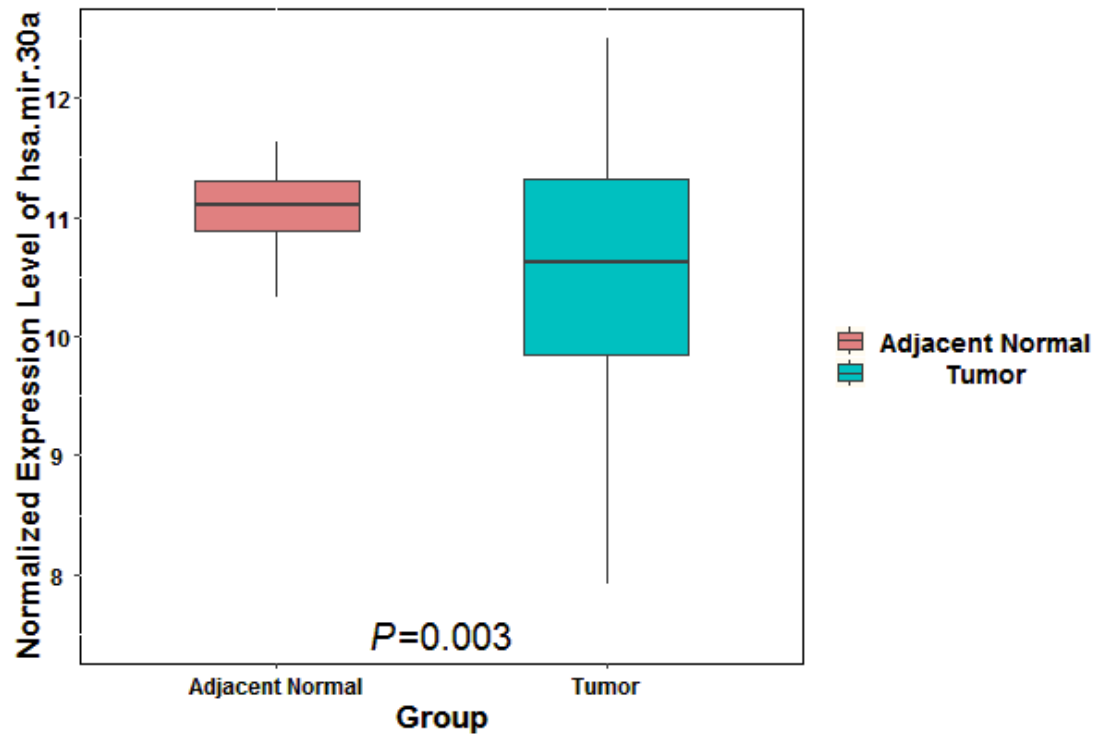

Supplement: f1 [file 8781348.f1.pdf]
